# Supplementary material
Source: publisher site journal article supplement (https://www.spandidos-publications.com/8397/downloadSupplementary)
Supplement: Supplementary file 1 [file downloadSupplementary]

**Table S1. Programmed cell death related genes obtained in the present study.**

| Pyroptosis | Parthanatos | Necrosis  | Necrosis like morphology | Necroptosis | Lysosome dependent cell death | Intrinsic apoptosis | Immunogenic cell death | Ferroptosis | Extrinsic apoptosis | Entotic cell death | Cuproptosis | Autophagy | Apoptosis like morphology | Anoikis |
|------------|-------------|-----------|--------------------------|-------------|-------------------------------|---------------------|------------------------|-------------|---------------------|--------------------|-------------|-----------|---------------------------|---------|
| GSDMD      | AIFM1       | TNF       | TP53                     | RIPK1       | TP53                          | CBLIF               | TP53                   | ZNF419      | CASP8               | TP53               | ATP7A       | AMBRA1    | TP53                      | PTK2    |
| GSDME      | PARP1       | TNFRSF1A  | AKT1                     | RIPK3       | EGFR                          | BCL2                | ADA                    | ZFP69B      | BCL2                | MTOR               | ATP7B       | APOL1     | TERT                      | PIK3CA  |
| NLRP3      | ADPRS       | COL2A1    | VIM                      | MLKL        | ATM                           | CASP8               | FAS                    | ZFP36       | CASP3               | TNFSF10            | CDKN2A      | ARNT      | PTCH1                     | CEACA   |
| CASP1      | RNF146      | TNFRSF1B  | MYC                      | ZBP1        | AKT1                          | CASP3               | EGFR                   | YY1AP1      | FAS                 | GZMB               | DBT         | ARSA      | MYC                       | M6      |
| CASP4      | NAMPT       | TNFSF10   | BCL2                     | CASP8       | TNF                           | BAX                 | BCL2                   | YWHAE       | BAX                 | EZR                | DLAT        | ARSB      | VIM                       | PDK4    |
| GSDMB      | GPX4        | IL6       | KRT5                     | TNF         | PDCD1                         | FAS                 | PTEN                   | XBP1        | XIAP                | MRTFA              | DLD         | ATF4      | BCL2                      | BCL2    |
| GSDMC      | MAPK8       | LTA       | RAC1                     | CYLD        | MTOR                          | XIAP                | CASP8                  | WIP2        | CFLAR               | DIAPH1             | DLST        | ATF6      | MAPK1                     | TSC2    |
| NLRP1      | SQSTM1      | IL1B      | FAS                      | ITPK1       | IL6                           | TP53                | ATM                    | WIP1        | FASLG               | MAP1LC             | FDX1        | ATG10     | TNF                       | PTRH2   |
| IL1B       | CAST        | FAS       | ABL1                     | IPMK        | VHL                           | CASP9               | PIK3CA                 | VLDLR       | TP53                | 3A                 | GCSH        | ATG12     | DNAH8                     | STK11   |
| GZMB       | AIMP2       | IL10      | CASP8                    | MAP3K7      | CD274                         | CFLAR               | AKT1                   | VEGFA       | TNFSF10             | LPAR2              | GLS         | ATG16L1   | EGFR                      | MAP3K7  |
| GSDMA      | RIPK1       | TNFSF11   | IL2RA                    | CASP6       | DAPK1                         | FASLG               | KRAS                   | USP7        | CASP9               | CDH1               | LIAS        | ATG16L2   | FAS                       | NTRK2   |
| AIM2       | FEN1        | TRPV4     | AIFM1                    | TRPM7       | RIPK1                         | CASP10              | KIT                    | ULK2        | CASP10              | CTNNA1             | LIPT1       | ATG2A     | GSN                       | CRYBA1  |
| CARD8      | ESR1        | FASLG     | LETM1                    | FADD        | ABL1                          | AIFM1               | TNF                    | ULK1        | AIFM1               | AMPK               | MTF1        | ATG2B     | RAF1                      | MCL1    |
| CASP8      | RAB33A      | TNFSF13B  | CASP3                    | PEL1        | IL1B                          | TNFSF10             | PDCD1                  | UBC         | MCL1                | RHOA               | PDHA1       | ATG3      | CASP3                     | DAPK2   |
| GZMA       | DIABLO      | TNFRSF10A | SLC2A1                   | PGLYRP1     | ICAM1                         | BCL2L1              | CDKN2A                 | TXNRD1      | BCL2L1              | ROCK               | PDHB        | ATG4A     | CCND1                     | NOTCH1  |
| PYCARD     | MCL1        | IFNG      | IFNG                     | SPATA2      | JAK2                          | MCL1                | FASLG                  | TXNIP       | CYCS                | ATG5               | SLC31A1     | ATG4B     | JAK2                      | TLE1    |
| DPP9       | DDB1        | TNFRSF10B | CYCS                     | SIRT3       | STK11                         | CYCS                | CCND1                  | TUBE1       | TNF                 | ATG7               | SLC25A3     | ATG4C     | AR                        | CAV1    |
| CASP5      | CUL4A       | TRAF2     | TNFRSF1A                 | HMGB1       | PPARG                         | BCL2L11             | MYC                    | TTPA        | TNFRSF10B           | P3K3C              |             | ATG4D     | TUBB                      | SNAI2   |
| IL18       | TOMM20      | MT-ATP6   | PEPD                     | TP53        | SRC                           | BIRC5               | BRAF                   | TSC22D3     | BIRC5               | BECN1              |             | ATG5      | NDE1                      | IKBK    |
| ZBP1       | OTUD1       | TNFAIP3   | PGR                      | TNFRSF1A    | HIF1A                         | CUBN                | CTNNB1                 | TRIB3       | BCL2L11             | CYBB               |             | ATG7      | GLI1                      | SRC     |
| CASP3      | DCAF10      | TNFRSF14  | FOXP3                    | MEFV        | EGF                           | CASP7               | CASP3                  | TP63        | CASP7               | UVRAG              |             | ATG9A     | CYCS                      | AKT1    |
| NLR4       | PTEN        | TNFSF14   | PAFAH1B1                 | AIM2        | CFLAR                         | BOK                 | BAX                    | TNFAIP3     | CASP2               | RUBCN              |             | ATG9B     | SALL4                     | MTOR    |
| DPP8       | ESR2        | CXCL8     | KRT20                    | TNFAIP3     | TGFBR2                        | TNFRSF10B           | ERBB2                  | TMBIM4      | PRKCD               | CDC42              |             | ATIC      | MDM2                      | CHEK2   |
| MIR223     |             | CASP8     | FASLG                    | UCHL1       | PTPN11                        | TNF                 | STAT3                  | TLR4        | BID                 | RNF146             |             | BAG1      | AIFM1                     | E2F1    |
| CASP6      |             | TNFRSF11B | BAX                      | STING1      | CDK4                          | CASP2               | SCN5A                  | TIMM9       | TNFRSF10A           |                    |             | BAG3      | CAV1                      | ITGA5   |
| TRIM24     |             | TNFSF12   | NLRP3                    | TNIP1       | MCL1                          | CASP6               | IL6                    | TGFBR1      | PAWR                |                    |             | BAK1      | EDN1                      | ITGB1   |
| HMGB1      |             | TRADD     | HIF1A                    | SERTAD1     | PARP1                         | PRKCD               | MTOR                   | TFR2        | BOK                 |                    |             | BAX       | MKI67                     | BRMS1   |
| NAIP       |             | IL1A      | RIPK1                    | TRAF2       | TSC2                          | AKT1                | IFNG                   | TFAP2C      | AKT1                |                    |             | BCL2      | SNCA                      | CEACA   |
| MEFV       |             | TNFSF4    | PARP1                    | NFKB1       | MAPK14                        | MAPK8               | HRAS                   | TBK1        | CASP1               |                    |             | BCL2L1    | CDKN1A                    | M5      |
| DHX9       |             | TNFSF15   | ANXA5                    | CFLAR       | MITF                          | BID                 | TNFRSF10B              | SUV39H1     | MAPK8               |                    |             | BECN1     | CD40                      |         |
| NLRP9      |             | TNFSF13   | NFKB1                    | MAPK14      | PKLR                          | NAIP                | CDH1                   | STMN1       | CASP6               |                    |             | BID       | EDNRB                     |         |
| STAT3      |             | NUP62     | TNFSF10                  | FAS         | TSC1                          | CASP1               | TGFB1                  | STK11       | BIRC2               |                    |             | BIRC5     | BAX                       |         |
| SIRT1      |             | TP53      | HTRA2                    | BIRC2       | IKBK                          | BIRC2               | CD274                  | STEAP3      | PARP1               |                    |             | BIRC6     | NOS2                      |         |
| APIP       |             | ADAM17    | TKT                      | AIFM1       | PTGS2                         | MIP                 | NRAS                   | SRXN1       | FADD                |                    |             | BNIP1     | APP                       |         |
| MALAT1     |             | CASP3     | CASP9                    | KLHDC10     | IGF1R                         | PARP1               | MAPK1                  | SREBF2      | DIABLO              |                    |             | BNIP3     | PRKCD                     |         |
| GAS5       |             | RIPK1     | USF3                     | SFTPA1      | BCL2L11                       | DIABLO              | VHL                    | SREBF1      | SIVA1               |                    |             | BNIP3L    | USP9X                     |         |
| CTSG       |             | CRP       | TNFSF12                  | GSK3B       | CBL                           | KRAS                | FGFR3                  | SRC         | BIRC3               |                    |             | C12orf44  | TREX1                     |         |
| NEK7       |             | SLC25A19  | BCL2L1                   | XIAP        | CD36                          | LIM2                | RB1                    | SP1         | RIPK1               |                    |             | C17orf88  | ATRIP                     |         |
| KCNQ1OT1   |             | TNFRSF11A | HSPA5                    | MYC         | CDK6                          | PAWR                | TERT                   | SOCS1       | KRAS                |                    |             | CALCOC    | TGM1                      |         |
|            |             | CD40      | CAT                      | TNIP3       | GBA                           | MAPK1               | VEGFA                  | SNX4        | BAK1                |                    |             | O2        | ETS1                      |         |
| TREM2      |             | TNFRSF18  | GAPDH                    | TLR4        | PROM1                         | BAK1                | CD4                    | SNORA16     | CDKN1A              |                    |             | CAMKK2    | NOS3                      |         |
| FOXO3      |             | TNFRSF4   | AURKA                    | GJB1        | HMGB1                         | SIVA1               | IL10                   | A           | MOAP1               |                    |             | CANX      | CASP9                     |         |
| TP53       |             | TLR4      | CASP1                    | DNM1L       | FLT1                          | BIRC3               | KITLG                  | SMAD7       | MAPK1               |                    |             | CAPN1     | CD4                       |         |
| MIR30C1    |             | TNFSF9    | TNFSF15                  | PTGES3      | SQSTM1                        | TNFRSF10            | ALK                    | SLC7A5      | STAT3               |                    |             | CAPN10    | MAP3K1                    |         |
| NFE2L2     |             | TNFRSF25  | FGF14                    | UVRAG       | SMPD1                         | A                   | CDKN1A                 | SLC39A1     | TNFRSF1A            |                    |             | CAPN2     | PARP1                     |         |
| TXNIP      |             | CCL2      | XBP1                     | BRD4        | CHEK1                         | CDKN1A              | BAD                    | 4           | BIRC7               |                    |             | CAPNS1    | LEP                       |         |
| DDX3X      |             | TNFRSF9   | CASP2                    | RB1         | GSK3B                         | STAT3               | LMNA                   | SLC2A8      | MYC                 |                    |             | CASP1     | ANXA5                     |         |
| MIR22      |             | TNFSF18   | HMGB1                    | SIRT2       | YAP1                          | NRAS                | HLA-DRB1               | SLC2A6      | PEA15               |                    |             | CASP3     | JUN                       |         |
| NEAT1      |             | IL18      | ENDOG                    | IKBK        | TFEB                          | BBC3                | BCL2L1                 | SLC2A3      | MAP3K5              |                    |             | CASP4     | SLC6A3                    |         |
| MIR125A    |             | TNFAIP6   | GP6                      | DAPK1       | HSPA5                         | APAF1               | BID                    | SLC2A14     | NRAS                |                    |             | CASP8     | IL3                       |         |
| FOXP3      |             | MAPK8     | MBL2                     | FKBP1A      | FOXO3                         | MYC                 | BCL6                   | SLC2A12     | CCAR1               |                    |             | CCL2      | CD44                      |         |
| SESN2      |             | TNFRSF6B  | BNIP3                    | MIR425      | NOTCH3                        | MAPK14              | RIPK1                  | SLC2A1      | APAF1               |                    |             | CCR2      | THBS1                     |         |
| ELANE      |             | CD40LG    | GSS                      | EZH2        | TRAF2                         | BAD                 | ABL1                   | SLC1A4      | MAPK14              |                    |             | CD46      | CUL3                      |         |

|          |           |          |           |          |           |          |         |           |          |         |
|----------|-----------|----------|-----------|----------|-----------|----------|---------|-----------|----------|---------|
| TNF      | TNFRSF10C | SP1      | NFE2L2    | IL6ST    | MOAP1     | CXCL8    | SLC16A1 | ANXA5     | CDKN1A   | NME1    |
| GBP1     | TNFRSF10D | TNFRSF10 | CD274     | CTSD     | RIPK1     | IL2      | SIRT3   | BAD       | CDKN1B   | BCL2L1  |
| MEG3     | LTBR      | A        | CHMP4B    | SIRT1    | API5      | XIAP     | SETD1B  | BFAR      | CDKN2A   | CASP7   |
| MIR135B  | ICAM1     | TNFRSF10 | CXCL5     | VCP      | MAP3K5    | MAPK8    | SELENOS | AVEN      | CFLAR    | PRKCA   |
| MIR556   | TNFRSF8   | B        | MIR29B1   | TRAF6    | BIRC7     | IL1B     | SCP2    | NOL3      | CHMP2B   | EPO     |
| FMR1     | FADD      | NRIP1    | BCL2      | SHC1     | CCAR2     | ICAM1    | SAT1    | CASP4     | CHMP4B   | SIRT1   |
| MIR302A  | MYLK      | IAPP     | AXL       | CTSB     | FADD      | TTN      | RPTOR   | BBC3      | CLN3     | FDFT1   |
| UBR2     | TNFSF8    | CAPN1    | MERTK     | STK4     | AEN       | RET      | RIPK1   | IL1B      | CTSB     | CAT     |
| CPTP     | COL1A1    | BECN1    | TYRO3     | PKM      | CCAR1     | BRCA1    | RGS4    | TRAF2     | CTSD     | TLR3    |
| GJA1     | XIAP      | TNFRSF12 | SIRT6     | CD86     | AVEN      | CXCR4    | RELA    | PERP      | CTSL1    | BIRC5   |
| SNIP1    | ADAR      | A        | NAT2      | ITGA5    | TNFRSF1A  | NFKB1    | RB1     | IL10      | CX3CL1   | REN     |
| PRDM1    | IL1RN     | ENO1     | SLC39A7   | CTNND1   | CASP4     | CTLA4    | PVT1    | TRIAP1    | CXCR4    | MCL1    |
| MIR214   | TNFRSF17  | TYMS     | USP22     | PARK7    | PEA15     | BRCA2    | PTGS2   | IL6       | DAPK1    | JAK3    |
| PCSK9    | TNFRSF13B | PDLIM1   | PANX1     | NLRP3    | ANXA5     | STAT1    | PTEN    | JUN       | DAPK2    | MAPK8   |
| VDR      | TGFB1     | RPAIN    | PDCD6IP   | BECN1    | JUN       | JAK2     | PSAT1   | TNFRSF10C | DDIT3    | NOS1    |
| BRD4     | TGFB2     | TNFRSF6B | FLOT1     | AHR      | PERP      | EPCAM    | PROM2   | TNFRSF10D | DIRAS3   | PRKCE   |
| AGER     | ACTA2     | PLA2G7   | FLOT2     | HDAC6    | MDM2      | PTCH1    | PRKAA2  | IFNG      | DLC1     | BIRC8   |
| IKBKE    | LTB       | MYO10    | IL37      | XRCC5    | CIAPIN1   | VCAM1    | PRKAA1  | IL2       | DNAJB1   | ADIPOQ  |
| PKM      | TRAF3     | DIABLO   | DIABLO    | RIPK3    | BFAR      | STK11    | PRDX6   | MDM2      | DNAJB9   | ANXA1   |
| KIF23    | RIPK3     | ATG4B    | FASN      | HSPA8    | NOL3      | JUN      | PRDX1   | NFKB1     | DRAM1    | HTRA2   |
| IFI16    | IL4       | ATG3     | CDK9      | RPS27A   | TP53AIP1  | CD44     | POR     | TRADD     | EDEM1    | FDPS    |
| CRTAC1   | TNFRSF19  | MAP1LC3  | TIMM50    | ANXA2    | AATF      | FLT3     | POM121L | BCL2L2    | EEF2     | LTF     |
| SEZ6L2   | TRAF1     | A        | SLC25A37  | C9orf72  | TRIAP1    | MIR34A   | 12      | CASP14    | EEF2K    | CASP6   |
| SMIM1    | PTGS2     | PRKAA1   | PPP1R3G   | MAP3K7   | E2F1      | PPARG    | PML     | BIK       | EGFR     | CASP1   |
| MIR20B   | TNFRSF12A |          | MIR7-1    | IL1R1    | MTOR      | ITGB1    | PLIN4   | CXCL8     | EIF2AK2  | DNASE1  |
| MIR448   | SMAD3     |          | NFKBIA    | HCK      | TP53BP2   | SRC      | PLIN2   | E2F1      | EIF2AK3  | CD47    |
| TET2     | CD70      |          | AURKC     | DDR1     | NFKB1     | PIK3R1   | PLA2G6  | CASP5     | EIF2S1   | TNFSF10 |
| TRAF6    | ADIPOQ    |          | NGFR      | VTN      | CHEK2     | TNFSF10  | PIR     | MTOR      | EIF4EBP1 | RASSF1  |
| CTSV     | VCAM1     |          | FMR1      | PRKAA1   | AREL1     | NCAM1    | PHKG2   | GZMB      | EIF4G1   | XDH     |
| UTS2     | CSF2      |          | GNLY      | UBC      | DAXX      | EGF      | PHF21A  | EGFR      | ERBB2    | CHP1    |
| ZNF532   | HLA-DRB1  |          | PARP1     | IRF3     | RAF1      | IL4      | PGD     | SOD2      | ERN1     | TUBA4A  |
| MIR155H  | HLA-B     |          | HTRA2     | ARSA     | GZMB      | CD40     | PEX6    | BCL2L14   | ERO1L    | CASP2   |
| G        | PRKG1     |          | HSPA5     | NEDD4    | EGFR      | C11orf65 | PEX3    | HSPA5     | FADD     | CAPN1   |
| MIR155   | TGFB1     |          | PRKAA2    | CD1D     | BCL2L2    | MUC1     | PEX2    | IL4       | FAM48A   | TP73    |
| ZFAS1    | SLC2A10   |          | PRKAA1    | LAMP2    | DDIAS     | IL2RA    | PEX12   | PYCARD    | FAS      | LALBA   |
| MIR527   | CFLAR     |          | PITPNA    | KCNB1    | CDKN2A    | PDCD1LG2 | PEX10   | DFFA      | FKBP1A   | MAPK14  |
| MLKL     | ACE       |          | METTL3    | IRAK1    | TRAF2     | HIF1A    | PEBP1   | PTEN      | FKBP1B   | F2R     |
| PTPN11   | MIF4GD-DT |          | TRAF5     | CTSK     | CAAP1     | PTPN11   | PCK2    | TGFB1     | FOS      | GADD45  |
| MAPK14   | TNFRSF21  |          | FNDCC4    | TAB2     | TNFRSF10C | TGFB1    | PARK7   | RAF1      | FOXO1    | A       |
| NFKB1    | TRAF6     |          | FNDCC5    | ROR2     | ECSCR     | CFLAR    | PANX1   | BECN1     | FOXO3    | STAT5A  |
| APOE     | NFKB1     |          | FASLG     | GDF15    | MIR21     | BIRC5    | P4HB    | GSK3B     | HDAC1    | APOL1   |
| ANXA1    | LEP       |          | TXN       | IFNGR1   | TNFRSF10  | NPM1     | OXSRI   | TLR4      | HDAC6    | FAM111A |
| SDHB     | LOX       |          | RALBP1    | TRIM28   | D         | CDK4     | OTUB1   | CDK1      | HGS      | DYNC112 |
| P2RX7    | MYH11     |          | TP53I3    | CTSL     | MAPK3     | HLA-B    | OSBPL9  | FOXO3     | HIF1A    | ATRIP-T |
| EEF2K    | IL2       |          | GSDMD     | STUB1    | FOXO3     | CASP9    | NT5DC2  | HIF1A     | HSP90AB  | REX1    |
| FPR2     | ALB       |          | PRKN      | ATG5     | CASP14    | HAVCR2   | NRAS    | VEGFA     | 1        | BAK1    |
| HTRA1    | IL4I1     |          | HSP90AA1  | CAPN1    | TP73      | FGF2     | NR4A1   | BCL2L10   | HSPA5    | PLA2G4  |
| PAK2     | TGFB1     |          | STUB1     | LAMP1    | ERBB2     | PCNA     | NR1D2   | CD4       | HSPA8    | A       |
| NDUFA13  | TGFB3     |          | TNFSF10   | RPS6KA3  | BIK       | FH       | NR1D1   | DAXX      | HSPB8    | TNFRSF1 |
| CD274    | CYCS      |          | CDC37     | CUL1     | HIF1A     | INS      | NQO1    | MIR21     | IFNG     | 0A      |
| SETD7    | SELE      |          | RELA      | IAPP     | CLU       | MCL1     | NOX5    | HTRA2     | IKBKB    | TNFRSF1 |
| FGF21    | BIRC3     |          | TRPC6     | RB1CC1   | PTEN      | KDR      | NOX3    | TP73      | IKBKE    | 0B      |
| MIR185   | HMGB1     |          | SIRT5     | CSNK1A1  | CASP5     | CYCS     | NOX1    | MAPK3     | IL24     | APAF1   |
| DLX6-AS1 | VEGFA     |          | MIR21     | PPIA     | LMNA      | MDM2     | NOS2    | PTGS2     | IRGM     | BECN1   |
| MIR23A   | FLNA      |          | AURKA     | MCOLN1   | ATM       | NFKBIA   | NNMT    | CDKN2A    | ITGA3    | TERF1   |
| MIR520C  | IL1R1     |          | PLK1      | SERPINB3 | HRAS      | CD40LG   | NGB     | ATM       | ITGA6    | BCL2L11 |
| KLF3-AS1 | BIRC2     |          | TNFRSF10B | HGS      | PYCARD    | CD28     | NFS1    | CCND1     | ITGB1    | VDAC1   |
| MMP1     | ELN       |          | MYH9      | GAA      | ELAPOR1   | PARP1    | NEF2    | TNFSF12   | ITGB4    | SIRT3   |

|          |           |           |         |          |           |           |          |          |         |
|----------|-----------|-----------|---------|----------|-----------|-----------|----------|----------|---------|
| IKZF1    | CASP1     | CASP10    | RPTOR   | PMAIP1   | APC       | NEDD4L    | IL2RA    | ITPR1    | TUBA1B  |
| BSG      | NOTCH1    | SQSTM1    | CBLB    | PTGS2    | TNFRSF10A | NCF2      | PMAIP1   | GAA      | LINGO1  |
| CEBPB    | MAPK1     | SOAT1     | RAB7A   | BECN1    | FGFR1     | MYB       | RELA     | GABARA   | IDO1    |
| TFAM     | TRAF5     | TNFRSF10A | PEBP1   | IGF1     | RAC1      | MUC1      | TNFRSF25 | P        | STK17B  |
| PGF      | TNFAIP1   | HGF       | PHLPP1  | APP      | WT1       | MTOR      | MAPK10   | GABARA   | HERPUD  |
| TRIM21   | TNFRSF13C | SRC       | APOD    | CDK1     | MAPK14    | MTDH      | IGF1R    | PL1      | 1       |
| CEP55    | IL17A     | ANXA1     | UBB     | CD4      | IL7       | MTCH1     | F10      | GABARA   | TFPT    |
| CXCL8    | SMAD4     | CASP2     | IFNAR1  | DDFA     | MITF      | MT3       | TET2     | PL2      | RUNX3   |
| NLRX1    | TNFAIP2   | FPR1      | RAB5A   | TGFB1    | VIM       | MT1G      | IGF1     | GAPDH    | SIRT2   |
| SLC16A4  | RELT      | MIF       | CLCN7   | VEGFA    | CXCL12    | MT1DP     | IL15     | GNAI3    | ENDOG   |
| USF2     | CBS       | BCL2L1    | DACT1   | SEPTIN4  | BCR       | MMP13     | JAK2     | GNB2L1   | BAD     |
| IL32     | MMP9      | KL        | NUMB    | SQSTM1   | APP       | MMD       | RNF34    | GOPC     | ATP12A  |
| PIF1     | FBN1      | TNFRSF21  | AQP2    | PML      | SYK       | MLLT1     | CLU      | GRID1    | PDE5A   |
| SLC30A7  | IFNA1     | BMI1      | CLDN5   | CCND1    | IL3       | MIR9-3    | SIRT1    | GRID2    | PSIP1   |
| CHRFAM7  | TERT      | BBC3      | MAP1LC3 | HSPA5    | FGFR2     | MIR9-2    | PTK2     | KIAA0226 | ATOH1   |
| A        | HBB       | AVEN      | A       | BCL2L10  | TSC2      | MIR9-1    | MAPK9    | KIAA0652 | TOP3B   |
| MIR21    | CD27      | ZNF7      | VPS33A  | SOD2     | ABCB1     | MIR6852   | IL1A     | KIAA0831 | MIR130A |
| MIR124-1 | FOXE3     | PTEN      | TNK2    | LDB3     | NFE2L2    | MIR4715   | PIK3CG   | KIF5B    | PPP3R2  |
| MIR200C  | BAX       | ESR2      | CSNK1E  | HTRA2    | TFRC      | MIR424    | PML      | KLHL24   | PRDX6   |
| MIR195   | JUN       | GSK3A     | NCOA4   | MAPK10   | IRF1      | miR-378a- | IL18     | LAMP1    | PRDX5   |
| MIR485   | TLR2      | C5        | ARL8B   | BCL2L14  | TRA       | 3p        | CDK2     | LAMP2    | PDGFD   |
| MALT1    | MFAP5     | SP1       | ULK1    | TRADD    | KCNH2     | MIR30B    | HDAC9    | MAP1LC3  | SQLE    |
| TLR2     | NFKBIA    | C9        | UBE2D1  | IL10     | CD3E      | MIR214    | ICAM1    | A        | H2BC21  |
| ICAM1    | MAPK14    | ATG5      | SLC1A5  | IL2      | RELA      | MIR212    | DAPK1    | MAP1LC3  | H1-1    |
| STK4     | BCL2      | C6        | ABL2    | SIRT1    | FOS       | miR-182-5 | NFKBIA   | B        | GZMA    |
| GSK3B    | PLOD1     | C7        | MSTN    | HINT1    | CDK1      | p         | FOS      | MAP1LC3  | GPR87   |
| PTGS2    | CD14      | CD74      | MAP1LC3 | CDK2     | CD34      | MIR17     | TLR2     | C        | BCL2L2  |
| MST1     | CSF1      | EGR1      | B       | ESR1     | ENG       | MIR137    | BAG3     | MAP2K7   | RPS5    |
| PRF1     | MLKL      | NOX4      | SNAP23  | RB1      | TNFRSF1A  | MIOX      | IL3      | MAPK1    | UBE3C   |
| PRMT5    | BGN       | RCN1      | AGFG1   | ACTA2    | TP73      | MAPK9     | VDAC1    | MAPK3    | PRDX4   |
| VTN      | CHUK      | MKRN1     | GABRA1  | IFNG     | PRF1      | MAPK8     | CTLA4    | MAPK8    | MAPK13  |
| ELAVL1   | SMAD2     | TNFSF12   | VPS4B   | PPP1R13B | CAV1      | MAP3K5    | BCL2A1   | MAPK8IP  | WNK3    |
| MPEG1    | ESR1      | UHRF1     | GABARA  | DDIT3    | CD247     | MAP3K11   | TXN      | 1        | ADRB3   |
| STING1   | ACTA2-AS1 | AIFM2     | PL1     | PIK3CG   | MMP9      | MAP1LC3   | SRC      | MAPK9    | BIK     |
| MIR204   | PARP1     | CTSB      | GABARA  | RELA     | HLA-A     | A         | RIPK3    | MBTPS2   | H3C15   |
| CDKN2B-  | MAT2A     | CD40LG    | P       | MAP2K1   | CSF2      | MAFG      | PPP1R13B | MLST8    | PLAAT4  |
| AS1      | EDAR      | OGT       | SBF2    | TNFRSF25 | SOD1      | LYRM1     | DFFB     | MTMR14   | BCL2L10 |
| HOTTIP   | IKBKB     | BID       | UBE2D3  | PPARG    | HMGB1     | LURAP1L   | CXCR3    | MTOR     | TDRD3   |
| MIR141   | JAG1      | IFNB1     | VAMP8   | FLNC     | GZMB      | LRRFIP1   | TNFRSF1B | MYC      | SERPINB |
| MIR9-1   | NOS2      | IDI1      | TAB3    | CDKN1B   | CSF3      | LPIN1     | TRAF1    | NAF1     | 9       |
| MIR455   | MIR21     | MIR155    | VAMP7   | IGF1R    | FHIT      | LONP1     | IL5      | NAMPT    | ANKRD3  |
| MIR9-2   | MMP1      | TLR3      | ATP13A2 | IL3      | PTGS2     | LOC39070  | BIRC6    | NBR1     | 6B      |
| MIR9-3   | HMOX1     | KIAA1191  | BACE2   | AKT2     | TSC1      | 5         | CCL2     | NCKAP1   | MIOX    |
| MIR497   | F3        | CYP3A4    | MIR33A  | OPA1     | MMP2      | LOC28456  | DDIT3    | NFE2L2   |         |
| LINC-ROR | TNFAIP8L2 | PAK1      | CALCOC  | CXCL8    | TP63      | 1         | APP      | NFKB1    |         |
| ABL1     | SERPINE1  | SGK1      | O2      | HRK      | FOXP3     | LINC0061  | FAF1     | NKX2-3   |         |
| EPHA2    | MMP3      | CDC7      | RNF41   | AATBC    | MYD88     | 8         | BRCA1    | NLRC4    |         |
| HDAC6    | RELA      | IDO1      | LGALS8  | ABL1     | TRB       | LINC0047  | IFI27    | NPC1     |         |
| PPARG    | COL3A1    | SMN1      | UBE2E1  | NFKBIA   | MLH1      | 2         | PPARG    | NRG1     |         |
| TLR3     | CSF3      | SMN2      | GABARA  | BCL2L13  | CREBBP    | LINC0033  | STK4     | NRG2     |         |
| SQSTM1   | MAP3K5    | CERK      | PL2     | CTNNB1   | KLRK1     | 6         | BCL10    | NRG3     |         |
| CDK9     | MED12     | TRADD     | UBE2D2  | IL6      | GATA2     | LIG3      | ATG5     | P4HB     |         |
| IRF3     | FBN2      | TP63      | CBLL1   | BRCA2    | CALM2     | LCE2C     | HMGB1    | PARK2    |         |
| UCP1     | TNFAIP8   | IL1A      | ULK2    | TIA1     | IGF1      | LAMP2     | MAP2K1   | PARP1    |         |
| TREM1    | INS       | PADI4     | SMCR8   | TNFSF12  | TLR4      | KRAS      | ABL1     | PEA15    |         |
| TSLP     | COMP      | MIR214    | RAB21   | TET2     | IGF1R     | KLHL24    | CDKN1B   | PELP1    |         |
| ZDHHHC1  | NGFR      | MIR22     | ATG13   | IL1B     | BTK       | KIM-1     | NGF      | PEX14    |         |
| HNP1     | NEK9      | MIR221    | STX5    | SRC      | IL1A      | JUN       | CTNNB1   | PEX3     |         |

|          |             |          |          |          |          |            |           |          |
|----------|-------------|----------|----------|----------|----------|------------|-----------|----------|
| PTEN     | COL5A1      | MIR101-1 | MCOLN3   | BRCA1    | FN1      | JDP2       | RBI       | PIK3C3   |
| DRD2     | MEFV        | MIR485   | VPS11    | YWHAQ    | CD19     | ISCU       | HSPB1     | PIK3R4   |
| ADORA1   | BMP6        | MIR101-2 | MCOLN2   | NR3C1    | CCL2     | INTS2      | HMOX1     | PINK1    |
| ADORA2B  | EDA         | CTSD     | VPS16    | MAPK9    | ICOS     | IL33       | ERBB3     | PPP1R15A |
| ADORA2   | TNFSF12-TNF | CLEC7A   | SHFL     | AKT3     | CD8A     | IL1B       | CD40      | PRKAB1   |
| A        | SF13        | OTULIN   | ILKAP    | CBL      | LHCGR    | IFNG       | TERT      | PRKAR1A  |
| ADORA3   | GNPTAB      | TRIM28   | PDE1C    | PTK2     | EPO      | IDH1       | AR        | PRKCD    |
| OSM      | NPM1        | STAT3    | EI24     | PCNA     | MAPK3    | HSD17B1    | ESR1      | PRKCCQ   |
| METTL3   | COL5A2      | PGAM5    | PLEKHM1  | CSEIL    | HGF      | 1          | EGF       | PTEN     |
| PECAM1   | NDE1        | HPRT1    | MREG     | TP63     | THY1     | hsa_circ_0 | NR4A1     | PTK6     |
| METTL14  | LOC10144820 | FAP      | CACYBP   | JAK2     | BIRC3    | 008367     | STAT1     | RAB11A   |
| TRIM31   | 2           | CHL1     | FYCO1    | YWHAE    | HSP90AA1 | HRAAS      | TNFRSF11B | RAB1A    |
| MIR25    | LOC11393994 | TRIM24   | GPSM1    | HSP90AA1 | SLC4A1   | HNF4A      | TNFAIP3   | RAB24    |
| CAMP     | 4           | TGFBR1   | ROBO3    | XAF1     | SMARCA4  | HILPDA     | SOD1      | RAB33B   |
| NLRP6    | TRAF4       | CDKN2A   | ACP2     | HDAC9    | TET2     | HIC1       | IFNA1     | RAB5A    |
| MRE11    | FN1         | SNCA     | VPS18    | DFFB     | CDK6     | HERPUD1    | CHUK      | RAB7A    |
| FNDC4    | GBA1        | ACVR1B   | MAEL     | RIPK3    | CD36     | HELLS      | F3        | RAC1     |
| FNDC5    | IL1RAPL2    | DDX58    | SLC2A12  | VDAC1    | ALB      | HCAR1      | NFE2L2    | RAF1     |
| MAP3K7   | EDA2R       | PYGM     | ATG4A    | FOS      | TLR2     | HBA1       | CAT       | RB1      |
| PARP1    | HEY2        | TARDBP   | NLRP6    | HSPB1    | MIR20A   | HAMP       | PIK3CA    | RB1CC1   |
| USP8     | F5          | CCL2     | LAMTOR   | NFE2L2   | POU5F1   | GSK3B      | YAP1      | RELA     |
| PRKN     | GATA4       | XRCC1    | 5        | DYSF     | MIR29A   | GRIA3      | PAK2      | RGS19    |
| GBP5     | C1QTNF5     | DPEP1    | VPS41    | BDNF     | GFAP     | GPX2       | KRT18     | RHEB     |
| NR1H2    | TRAP1       | CHMP1A   | SIGLEC15 | HMGB1    | B2M      | GPT2       | HRAS      | RPS6KB1  |
| MK167    | GPT         | UBR2     | CTSV     | PIK3CA   | CD27     | GPAT4      | ERBB2     | RPTOR    |
| USP47    | NOD2        | GPX4     | SCFD1    | TCN2     | FCGR3A   | GLUT13     | MPO       | SAR1A    |
| TCEA3    | HGF         | LAMP2    | STX6     | YWHAB    | ITGB2    | GDF15      | CHEK2     | SERPINA  |
| IL36G    | C1QTNF3     | MPRIP    | SEC22B   | YAP1     | CREB1    | GCH1       | TP63      | 1        |
| IL36B    | IL2RB       | MTOR     | MIR33B   | BCL2A1   | IFNA1    | GABPB1     | NR3C1     | SESN2    |
| TP63     | CASP9       | BRAF     | MAP1LC3  | PTPN11   | ING1     | GABARA     | PCNA      | SH3GLB1  |
| IRF1     | HIF1A-AS1   | AFP      | C        | IL4      | HMOX1    | PL2        | CD274     | SIRT1    |
| IRF2     | SRFBP1      | ACHE     | KDM7A    | EGF      | CEACAM5  | GABARA     | RARA      | SIRT2    |
| PRTN3    | MYLK-AS1    | NFAT5    | TIFAB    | CD40     | CCL5     | PL1        | TLR3      | SPHK1    |
| SERPINB1 | LINC01389   | CXCL1    |          | PDCD6    | PDGFRA   | G6PDX      | IKBKB     | SPNS1    |
| IL1A     | SMAD6       | VIL1     |          | HMOX1    | IL15     | G6PD       | YWHAB     | SQSTM1   |
| CHMP4B   | TIMP1       | SHARPIN  |          | IL5      | SOX2     | FZD7       | ALB       | ST13     |
| DUOX1    | EP300       | CBL      |          | PRKN     | ITGA4    | FXN        | ENDOG     | STK11    |
| APOL1    | ELANE       | MAPK1    |          | PDCD5    | FBXW7    | FNDC5      | HSPA4     | TBK1     |
| NLRP7    | TANK        | MAPK8    |          | RNF7     | MAPT     | FLT3       | MADD      | TM9SF1   |
| ANO6     | SLC12A5-AS1 | TBK1     |          | F3       | ITGB3    | FH         | HSP90AA1  | TMEM49   |
| BNIP3    | CCL5        | CTSH     |          | TTN      | ANXA5    | Fer1HCH    | CCNB1     | TMEM74   |
| XIST     | C1QTNF9     | GSN      |          | VCP      | NGF      | FBXW7      | ABCB1     | TNFSF10  |
| MIR107   | IL2RA       | RARG     |          | FAF1     | CALR     | FBW7       | CCNA2     | TP53     |
| MIR103A1 | STAT3       | BIRC3    |          | MYH7     | SPP1     | FAR1       | IFNB1     | TP53INP2 |
| MIR103A2 | TINF2       | CTSL     |          | GSK3B    | GBA      | FANCD2     | IRF1      | TP63     |
| FADD     | CTLA4       | CTSS     |          | TNFRSF1B | MSH6     | FADS2      | PRPF8     | TP73     |
| VCAM1    | GZMB        | DSTYK    |          | TLR4     | PROM1    | FADS1      | HIPK2     | TSC1     |
| EZH2     | ROBO4       | RNF31    |          | AR       | CSF1     | EPT1       | MMP9      | TSC2     |
| DNMT1    | PPARG       | TNFRSF25 |          | TXN      | PRKCA    | EPAS1      | NOS2      | TUSC1    |
| DNMT3A   | STAT1       | CHUK     |          | FOXO1    | BAK1     | ENPP2      | CCL5      | ULK1     |
| DNMT3B   | CREBBP      | BUB1B    |          | NGF      | IL2RB    | EMC2       | SQSTM1    | ULK2     |
| BAX      | C1QTNF1     | IRAK1    |          | SOD1     | CCR5     | ELOVL5     | NLRP1     | ULK3     |
| CYCS     | STING1      | BDNF     |          | CCNA2    | IL13     | EIF2AK4    | YWHAQ     | USP10    |
| POLA1    | IL12B       | EIF2AK3  |          | SYVN1    | IGH      | EGLN2      | CDK4      | UVRAG    |
| BAK1     | H19         | HSPA8    |          | CARD8    | NOS2     | EGFR       | CD69      | VAMP3    |
| CHMP2B   | ACAN        | IFNG     |          | ABCB1    | ERBB4    | DUSP1      | DAPK3     | VAMP7    |
| EED      | FGF2        | IKBKG    |          | CHUK     | VWF      | DUOX2      | IRF3      | VEGFA    |
| PRIM1    | TICAM1      | MAPK3    |          | ALB      | NTRK1    | DUOX1      | TNFRSF12A | WDFY3    |

|        |             |           |           |          |          |          |        |
|--------|-------------|-----------|-----------|----------|----------|----------|--------|
| RBBP4  | IGF1        | NQO1      | F10       | CAT      | DRD5     | F7       | WDR45  |
| RBBP7  | MIR155      | TAB2      | TRAF1     | CLU      | DRD4     | MAP2K4   | WDR45L |
| SUZ12  | CERNA3      | BECN1     | CAV3      | CEACAM1  | DPP4     | FCER2    | WIP11  |
| POLA2  | SOD2        | XBP1      | RASGRP1   | PMS2     | DNAJB6   | NGFR     | WIP2   |
| CHMP2A | HLA-A       | TICAM1    | EP300     | ERBB3    | DECR1    | HSPA1A   | ZFYVE1 |
| PRIM2  | IFNB1       | RBCK1     | MMP9      | CD79A    | DDIT4    | PRKCA    |        |
| CHMP3  | C1QTNF4     | SOX17     | DSP       | E2F1     | DDIT3    | CDK5     |        |
| CHMP7  | OTULIN      | UBC       | CAT       | NGFR     | DCAF7    | PIK3R1   |        |
| CHMP6  | IL15        | BNIP3     | STK4      | SP1      | DAZAP1   | CD27     |        |
| H2AX   | POLG        | HSPA4     | BRAF      | SOX9     | CYP4F8   | WVVOX    |        |
| CHMP4A | B2M         | TAB1      | BNIP3     | CASP1    | CYBB     | PRF1     |        |
| CHMP4C | LOC10050647 | AGFG1     | HDAC1     | ENO2     | CYB5R1   | PIDD1    |        |
| H3-3A  | 2           | TAB3      | SH3KBP1   | MMP1     | CXCL2    | PTPA     |        |
| H3-3B  | AAT1        | EIF2A     | TGM2      | ROS1     | CS       | IL13     |        |
| H3C1   | ANXA5       | MIB2      | IGFBP3    | CEP85L   | CISD2    | GSK3A    |        |
| H2AC20 | TNFAIP8L1   | TNIP2     | CDK5      | PLAU     | CISD1    | YWHAE    |        |
| H2AZ1  | PSMD2       | H1-5      | RARA      | LIG4     | CircLL4R | ELANE    |        |
| H2BC21 | MEG3        | DIRAS3    | IFNA1     | DDX3X    | CHP1     | IGHE     |        |
| H4-16  | AKT1        | C20orf204 | BCL10     | MIR19A   | CHMP6    | CXCR4    |        |
| H4C1   | F2          | EGFR      | IKBKB     | MME      | CHMP5    | SMPD1    |        |
| H2BC4  | PTX3        | JAK1      | MIR146A   | IDH1     | CEBPG    | FOXO1    |        |
| H3C2   | C1QTNF6     | FLT3      | IRF1      | TNFRSF1B | CDO1     | MAP3K7   |        |
| H3C3   | IKBKG       | IDH1      | NOS2      | MS4A1    | CDKN2A   | SP1      |        |
| H4C2   | TNFAIP8L3   | IDH2      | YWHAZ     | BIRC2    | CDH1     | PDCD1    |        |
| H2AC4  | BMP2        | HMOX1     | BIRC6     | TLX1     | CDCA3    | IL24     |        |
| H2BC5  | CCL3        | MMP13     | IL2RA     | DNMT3A   | CD82     | CDH1     |        |
| H3C12  | NPPA        | ATP2A1    | PIK3R1    | TGFB2    | CD44     | PRKN     |        |
| H3C4   | CASP10      | CAD       | DAPK1     | SELE     | CAV1     | CD8A     |        |
| H4C11  | CCR6        | CASP1     | SP1       | MK167    | CARS1    | IL17A    |        |
| H4C3   | IRF1        | DRD2      | BAG3      | HLA-G    | CAPG     | TFPI     |        |
| H4C8   | ZFP36       | EPAS1     | RIPK2     | IL17A    | CA9      | ATR      |        |
| H4C9   | HLA-DQB1    | G6PD      | ENDOG     | TGFA     | BRPF1    | STK11    |        |
| H2BC12 | EGF         | GJA1      | TNFRSF11B | ALCAM    | BRDT     | EPO      |        |
| H2BC14 | IL13        | NPM1      | STAT1     | CDKN3    | BRD3     | KIT      |        |
| H2BC9  | SOD1        | TSC2      | PPP1R13L  | SNCA     | BRD2     | BDNF     |        |
| H3C10  | MAP3K14     | VCP       | C1QBP     | ICOSLG   | BNIP3    | CSF2     |        |
| H3C14  | ACTA1       | VIM       | DNM1L     | TCL1A    | BLOC1S5  | IGFBP3   |        |
| H4C12  | NOS3        | ACTB      | MAP2K4    | THPO     | -TXNDC5  | TNFSF11  |        |
| H4C14  | HSP90AA1    | AHR       | CCNB1     | SST      | BID      | HGF      |        |
| H4C5   | BCL2L1      | BAX       | VHL       | MYCN     | BCAT2    | BNIP3    |        |
| H2AC14 | STAT4       | EEF2      | HIPK2     | AURKA    | BACH1    | CASP12   |        |
| H2AC18 | TYMS        | KIF11     | GSDME     | TLR3     | AURKA    | STK3     |        |
| H2AC6  | IL3         | PTPN6     | TERT      | GSK3B    | ATP6V1G  | CAV1     |        |
| H2AC7  | NAGLU       | RPS19     | PRKCA     | CALM1    | 2        | CCL3     |        |
| H2AJ   | MIR221      | YWHAE     | F8        | THBD     | ATM      | DNM1L    |        |
| H2AZ2  | PTPN11      | YWHAG     | NR4A1     | CD80     | ATG7     | NPM1     |        |
| H2BC1  | REN         | APC       | CDK4      | PDGFB    | ATG4D    | H2AX     |        |
| H2BC10 | MIR146A     | BAP1      | NGFR      | MIR93    | ATG3     | F2       |        |
| H2BC11 | BDNF-AS     | HSP90AB1  | HSPA4     | BMP6     | ATG16L1  | CRADD    |        |
| H2BC13 | IRF3        | HSPD1     | HSPA1A    | HDAC9    | ATG13    | SELL     |        |
| H2BC3  | BGLAP       | KRT18     | ACTC1     | BMP2     | ATF2     | YWHAZ    |        |
| H2BC6  | MAPK3       | LEF1      | SCN5A     | HSPA5    | ASNS     | C1QBP    |        |
| H3C11  | SGCA        | LRP1      | TNFAIP3   | THBS1    | ARRDC3   | TNFSF13B |        |
| H3C6   | CALCA       | MAPKAPK2  | PAK2      | HLA-DQB1 | ARNTL    | FN1      |        |
| H3C7   | TERC        | NOD2      | CREBBP    | SERPINE1 | AQP8     | CXCL2    |        |
| H3C8   | RTEL1       | PIKFYVE   | PDCD6IP   | CHGA     | AQP5     | FLT3     |        |
| H4C13  | RETN        | PRDX1     | IFI27     | NTRK2    | AQP3     | SFTPD    |        |
| H4C4   | JAK2        | RANBP2    | STK3      | DSE      | ANO6     | FAM215A  |        |

|          |            |           |          |          |         |          |
|----------|------------|-----------|----------|----------|---------|----------|
| H4C6     | MB         | RPL11     | IRF3     | MPL      | ANGPTL7 | FAIM2    |
| H2AC8    | MAP3K7     | SLC16A1   | KRT18    | IL5      | AMN     | PIM1     |
| H2BC15   | LITAF      | TNNT2     | ATG5     | CSF1R    | ALOXE3  | CHEK1    |
| H2BC17   | ERAP1      | TPM1      | PSEN1    | TYR      | ALOX15B | PLK1     |
| H2BC7    | NR3C1      | AFG3L2    | YWHAG    | CASP7    | ALOX12B | ITPR1    |
| H2BC8    | MPO        | CLTC      | CXCR4    | IL18     | ALDH3A2 | LGALS3   |
| H2BU1    | THBD       | HIF1A     | MAP3K1   | CD209    | ALB     | SHC1     |
| H3C15    | MMP2       | HSPA9     | CSNK2A1  | FYN      | AGPS    | SFRP1    |
| H3C13    | WRAP53     | KRT1      | TLR2     | LEP      | AEBP2   | STAT6    |
| H4C15    | SELP       | KRT14     | KLHL9    | MPO      | ACVR1B  | UNC5B    |
| H2AB1    | COL1A2     | KRT5      | IL13     | CCND2    | ACSL3   | IER3     |
| H2AC19   | SLC22A12   | KRT8      | TAFAZZIN | NR3C1    | ACOT1   | PRKCI    |
| RNF103-C | HIF1A      | MYH14     | ESR2     | CTSD     | ACO1    | EP300    |
| HMP3     | C1QTNF2    | NFS1      | TPM1     | G6PD     | ACADSB  | BCAP31   |
| LOC10272 | UMOD       | NLRP3     | BCL6     | TNFSF11  | ABCC1   | PTPN13   |
| 4334     | INSR       | PINK1     | PRPF8    | ANK2     |         | GSN      |
| CAPN1    | STEAP4     | PPP1CB    | PRF1     | IL6ST    |         | NOTCH1   |
| VIM      | CTNNB1     | PRPS1     | NLRP1    | PLAUR    |         | EZH2     |
| JUN      | APOE       | PRSS1     | CDH1     | CCR6     |         | DNASE1L3 |
| RIPK3    | C1QTNF7    | RPL5      | CTSD     | CD2      |         | CRP      |
| MIR139   | CASP4      | SLC25A1   | ATR      | KRT19    |         | JAK1     |
| BRCC3    | IFNGR1     | SLC25A13  | TSC2     | CR2      |         | YWHAG    |
| BHLHE40  | APOH       | TNFRSF1B  | PLK1     | ITGAL    |         | ESR2     |
| BHLHE41  | IL23R      | TPM3      | KIT      | BAP1     |         | RPS6KB1  |
| ALK      | RYR1       | TRAF3     | SLC25A4  | HSPB1    |         | VHL      |
| CSNK1A1  | C1QTNF9B   | TUFM      | PDCD10   | ABCG2    |         | GAPDH    |
| BIRC3    | BAK1       | ARHGEF2   | TNFSF13B | STAT5A   |         | YWHAH    |
| TFAP2A   | CDKN2B-AS1 | ATF4      | ADA      | BSG      |         | CCR6     |
| BIRC2    | LCN2       | CALM1     | INS      | GPC3     |         | BRAF     |
| E2F4     | PTGS1      | COPB2     | CREB1    | HSPA4    |         | MMP2     |
| UBE2D2   | ACE2       | DDX3X     | PDCD1    | ABCC1    |         | CDK6     |
| LY96     | MIR7-3HG   | DDX5      | ACTN2    | GAPDH    |         | RFFL     |
| GLMN     | BID        | EIF4EBP1  | WWOX     | MMP14    |         | TNFRSF21 |
| SUGT1    | EDN1       | FLNC      | STK17B   | TNFSF13B |         | CD40LG   |
| IRGM     | TLR9       | HNRNPA1   | YWHAH    | TRG      |         | NOS3     |
| NLRP13   | PTPRC      | HNRNPA2B1 | IL15     | S100B    |         | DEDD     |
| SCAF11   | IL12A      | HSPA1A    | BCR      | CD81     |         | TNNI3    |
| ADAMTS9  | PLA2G4A    | IKBKE     | DAPK3    | F2       |         | CASP8AP2 |
| -AS2     | CST3       | IL4       | PPIA     | EPHA2    |         | ACIN1    |
| NINJ1    | LINC01672  | IRF3      | MAPT     | CD86     |         | FGF2     |
| TUBB6    | OPTN       | LTBP1     | NOTCH1   | IL21     |         | BMP6     |
| MYD88    | MIR210     | MYO5A     | H2AX     | ITGB4    |         | PTPRC    |
| TLR8     | IL5        | MYO6      | EZH2     | P2RX7    |         | DNAJA3   |
| APAF1    | MIR130A    | NUP214    | ITPR1    | CEACAM3  |         | DAPK2    |
| NOS1     | STAC3      | PABPN1    | LGALS3   | PTPN22   |         | HLA-DRB1 |
| NOS2     | GHRL       | PARK7     | GDNF     | PRKDC    |         | LCK      |
| PKN2     | CD4        | PFKL      | EPO      | MSN      |         | LMNA     |
| DPEP1    | C1QTNF8    | PKM       | TNNT2    | ACE      |         | PCSK9    |
| CHMP1A   | EGFR       | RIPK2     | CDC25C   | SELL     |         | SPP1     |
| PYDC2    | FLNC       | TET2      | SMPD1    | CEACAM6  |         | GDF15    |
| MUC20    | IL18R1     | TPM2      | MAP3K7   | VCP      |         | F5       |
| ACE2     | IL6R       | TRAF6     | PRKCE    | TJP1     |         | IL9      |
| EGFR     | CPT2       | TUBA4A    | SPP1     | TH       |         | MIR146A  |
| AKT1     | CXCL10     | TUBB4A    | TLR3     | ITGAV    |         | ITGAL    |
| ATF6     | CAT        | UBE2D3    | DSG2     | DPP4     |         | INS      |
| CASP9    | FCGR3A     | UGDH      | ALOX5    | ARID1A   |         | PTPN11   |
| ORMDL3   | GSDME      | CALM2     | PRKCI    | ATRX     |         | BMP4     |
| POP1     | TLR3       | CCT5      | BMF      | ITGA6    |         | TOP1     |

|          |           |         |          |           |           |
|----------|-----------|---------|----------|-----------|-----------|
| LINC0095 | PIK3CA    | FUS     | IL24     | VDR       | SERPINC1  |
| 8        | IL11      | KRT19   | NPM1     | HSPD1     | HP        |
| MIR4306  | PRF1      | LGALS3  | FHIT     | SELP      | NTRK1     |
| MDM2     | EPO       | MAP1B   | ERBB3    | SOD2      | TIMP3     |
| BTK      | MIR34A    | OPTN    | PTPA     | NES       | ALOX5     |
| BCL2     | KITLG     | PKP2    | STK11    | CD79B     | ULK1      |
| YWHAE    | NTRK1     | RPL35   | TNFSF11  | CCR7      | GADD45A   |
| ANXA2    | TIMP3     | RPS10   | RPS3     | MYLK      | ANXA1     |
| HSP90AA  | SPP1      | S100A4  | CADM3    | NANOG     | MAP3K14   |
| 1        | C4A       | UBE2L3  | SHC1     | CACNA1A   | MET       |
| HSP90AB1 | APOL1     | XRCC6   | CHEK1    | GATA4     | BCL2L12   |
| IL1RN    | PARN      | ACTC1   | RET      | HSPG2     | CREB1     |
| RIPK1    | UBC       | AHSG    | STIM1    | PAR3      | MIR210    |
| IFIH1    | NHP2      | ASIC1   | FOXP3    | FANCD2    | FGFR3     |
| IRAK3    | PROC      | CADM1   | SPHK1    | IL12B     | ODC1      |
| MELK     | LINC02605 | EEF1A1  | MFN2     | CCL3      | LYN       |
| NEDD4    | VDR       | EMD     | TCN1     | PSAP      | TMBIM4    |
| NFS1     | IL6ST     | FLII    | FGFR1    | ETS1      | KITLG     |
| YWHAZ    | RUNX2     | GBE1    | ATP1A1   | FUS       | BEX3      |
| BECN1    | HP        | KRT10   | GJA1     | TNFRSF10D | FOXP3     |
| CD14     | BRAF      | KRT16   | GAPDH    | AFP       | KAT5      |
| CHI3L1   | HLA-C     | KRT6A   | CSF2     | HLA-C     | OLR1      |
| STXBP2   | APOB      | LITAF   | MADD     | CD70      | RET       |
| TLR9     | SMPD1     | NDUFA4  | PDCD4    | TF        | ITGAM     |
| UBE2D3   | RANBP2    | NRIP1   | LGALS1   | MUC4      | P13       |
| GSTO1    | CXCR3     | PLEC    | CD27     | SHC1      | VIM       |
| RAB5A    | PROS1     | PNKD    | JAK3     | CXADR     | CDC25C    |
| TNFSF13B | KRT18     | PPM1B   | LCK      | TOP2A     | RAC1      |
| ASIC1    | MIF       | PSMA3   | IER3IP1  | EGR1      | BCL2L2-PA |
| HUWE1    | CASP7     | RBMX    | JAK1     | MBP       | BPN1      |
| LRPPRC   | ADAMTS2   | RPL15   | RAC1     | MIR27A    | PLG       |
| PANX1    | DKC1      | RPS14   | CTSB     | CIITA     | MIR16-1   |
| PDCD6IP  | NOP10     | RPS20   | NUPR1    | TNFRSF10C | BAG6      |
| USP24    | KRAS      | RPS3    | NTRK1    | JAK1      | GCG       |
| ATG7     | NFE2L2    | S100A10 | GSN      | TBK1      | UNC5A     |
| IL13     | MIR125A   | SFPQ    | GDF15    | BMP4      | ABCC1     |
| CDC37    | TYK2      | SKP2    | GSDMD    | TNFRSF8   | PRKCZ     |
| ERP44    | MATN3     | SLC25A5 | MKI67    | TRAF6     | ZC3H12A   |
| IL18BP   | PIK3C2A   | STK38   | CDKN3    | NRG1      | VCAM1     |
| TRPM2    | CCL4      | TCOF1   | F9       | CYP1A1    | IFIH1     |
| VPS4B    | HSPA1A    | TCP1    | VIM      | KRT8      | LTBR      |
| ATG3     | MIR29A    | TUBB4B  | TOP1     | NOTCH2    | NFKB2     |
| BST2     | SLC2A1    | ULK1    | SNCA     | GRP       | EGR1      |
| IL13RA2  | IRS1      | VDAC2   | RNASEL   | CD47      | EIF2S1    |
| LYST     | MT-CO1    | XRCC5   | MYBPC3   | ITGAM     | FGFR2     |
| STXBP3   | PSTPIP1   | XRN2    | TNFRSF21 | CXCR3     | DUSP19    |
| GPER1    | WNT5A     | AP2S1   | FLT3     | CTNNA1    | THBS1     |
| NCR1     | LBP       | BANF1   | CAV1     | NUMA1     | BMP2      |
| VPS28    | NLRP3     | CALM3   | ERN1     | GNAS      | SOCS3     |
| IL27     | CCR1      | CALU    | ICAM1    | BMI1      | FANCD2    |
| CLEC5A   | MIR122    | CAPZA1  | ATF2     | TIMP1     | ARFGEF2   |
| SEC22B   | TRPS1     | CNBP    | TRAF6    | CD55      | PTK2B     |
| SIGLEC14 | MALAT1    | COPA    | FAM215A  | NEDD9     | MKI67     |
| CGAS     | CDKN2A    | CUL4A   | BAG1     | ELANE     | MLKL      |
| MIR15A   | TGFA      | HNRNPU  | BCAP31   | EPAS1     | ACHE      |
|          | POLG2     | KHDRBS1 | CXCL12   | SCN4A     | CSF3      |
|          | SOD2-OT1  | KLF6    | PLEKHF1  | PDX1      | XBP1      |
|          | SELL      | KRT2    | TNNI3    | MAP2      | TIMP1     |

|             |          |          |          |          |
|-------------|----------|----------|----------|----------|
| ADAMTSL2    | KRT7     | EIF5A    | F3       | PDPK1    |
| VWF         | KRT9     | PIMI1    | PNP      | CXCL12   |
| FOS         | LGALS1   | F2       | IL4R     | CCND3    |
| PRKN        | MYO1C    | EIF2AK2  | CALCA    | IL7      |
| HAVCR1      | NCL      | KDR      | NFATC2   | SUMO1    |
| MYD88       | NSUN2    | PKP2     | HLA-DPB1 | FASN     |
| IFNA2       | PABPC1   | UACA     | NFATC1   | PSEN1    |
| MMP13       | PCBP1    | FGF2     | SEMA3A   | MAPT     |
| MIR214      | PCMI     | NDRG1    | BCAP31   | FAIM     |
| MTHFR       | PRPF8    | TRAF3    | FGF1     | NDUFS4   |
| THSD4       | RNGTT    | MYH6     | IRF4     | HSP90AB1 |
| CREB1       | RPL10A   | TMEM43   | CXCL10   | NLRP3    |
| MAPKAPK2    | RPL13    | IKBKG    | CHAT     | MIR223   |
| MT-ND6      | RPL13A   | CD274    | PRKCB    | FCMR     |
| MMP12       | RPL22    | FUT2     | CR1      | MEF2A    |
| TREX1       | RPL26    | LMNB1    | KLF4     | MIR590   |
| SH2D1A      | RPL27    | IER3     | PARK7    | F9       |
| PPARA       | RPL7     | PIDD1    | NLRP3    | EIF2AK3  |
| IL32        | RPL7A    | PTPMT1   | CD33     | MIR142   |
| BIRC5       | RPS12    | MT-CYB   | ITGA2    | SYK      |
| MIR132      | RPS13    | DMD      | BGLAP    | MYCN     |
| CCL11       | RPS17    | F11      | PTHLH    | TGFBR1   |
| POMC        | RPS24    | CARD16   | PVR      | HSPA8    |
| ADAM10      | RPS26    | SFN      | CD46     | TGFA     |
| PIK3CG      | RPS27    | MET      | NTRK3    | SIAH1    |
| CTC1        | RPS6     | HSP90AB1 | PLA2G6   | NUMA1    |
| ADA2        | S100A6   | ACIN1    | ANPEP    | IRS1     |
| PECAM1      | SLC25A10 | YY1      | ATR      | STAT5B   |
| GAPDH       | SLC30A9  | BAG6     | CD69     | ACE      |
| F10         | TANK     | PTPN13   | MIF      | PLAUR    |
| DNM1L       | TNFRSF8  | TNFRSF12 | HFE      | RHOA     |
| CASP5       | TUBA1B   | A        | BECN1    | TMBIM1   |
| SERPINC1    | TUBA1C   | TAF6     | FCGR2B   | SMAD7    |
| TONSL       | AGO2     | ACHE     | ADAM10   | FGFR1    |
| MIR146B     | AP2B1    | CRADD    | CD38     | NOX4     |
| SRC         | ATAD3A   | CDK6     | PDPN     | MALT1    |
| USB1        | BCLAF1   | MDM4     | CYP2A6   | CD80     |
| SP1         | CCT3     | XBP1     | CA9      | MIR155   |
| OLR1        | DNAJA1   | NOS3     | LEPR     | DEDD2    |
| CASP2       | DYNLL1   | CCL2     | AHR      | BCL2L15  |
| MAP3K1      | EIF4B    | LAMP2    | LGALS1   | DDX3X    |
| MYC         | ELAVL1   | PPM1D    | NEUROD1  | GDNF     |
| IKZF1       | IGF2BP3  | MIR499A  | KIR2DL3  | PAK1     |
| MIR222      | IVNS1ABP | HSPD1    | CD59     | PRDX2    |
| CTSK        | MAP1LC3A | SUMO1    | IFNB1    | LCN2     |
| ITGB3       | PAWR     | STK24    | XRCC5    | SFPQ     |
| SLC17A5     | PDIA4    | BNIP3L   | GLB1     | SFRP2    |
| ELP1        | PSMC4    | BMP6     | TRD      | SMPD2    |
| FGFR1       | PYCARD   | CD40LG   | HBG1     | EDN1     |
| SERPINA1    | RPL12    | HGF      | IDO1     | ITK      |
| IGFBP3      | RPL23A   | CAST     | F5       | CYLD     |
| RTEL1-TNFRS | RPL3     | NKX2-5   | CP       | GSTP1    |
| F6B         | RPL4     | CSNK2A2  | ITGA2B   | NTRK2    |
| DSPP        | RPL9     | MIR155   | TXN      | TRAF5    |
| CD36        | RPLP2    | STAT5A   | CASP6    | SERPINE1 |
| CD8A        | RPS23    | ABCC1    | CD68     | ITGAV    |
| LIF         | RPS29    | PPP1R15A | H2AX     | CXCL5    |
| ENG         | SLC25A6  | DYNLL1   | HSPA8    | IFI6     |

|             |          |          |           |          |
|-------------|----------|----------|-----------|----------|
| BMP7        | SNRPE    | JUP      | CD14      | TNFRSF8  |
| IBSP        | SRSF1    | MEF2A    | NECTIN1   | CD36     |
| ACPS5       | SVIL     | TMBIM6   | KIR2DL1   | P2RX7    |
| THBS1       | TUBB6    | MAPK11   | RPS27A    | HTT      |
| AGER        | CCNT1    | FGFR3    | GRN       | AGER     |
| SMAD5-AS1   | CCT6A    | STYXL1   | SMN1      | SMAD2    |
| LPL         | CCT8     | SREBF1   | TTR       | NRG1     |
| APOA1       | DDX17    | RPS6KB1  | SERPINA3  | CBL      |
| IRAK1       | DNAJA2   | MPZ      | MMP3      | S100A9   |
| ITGAM       | FIP1L1   | BMP4     | XRCC6     | SPTAN1   |
| LOC10028732 | HSPA1B   | LRP2     | NT5E      | PROC     |
| 9           | IGF2BP1  | F5       | PSCA      | CCR5     |
| ARSB        | IL24     | TIMP1    | BRD4      | ATG14    |
| EGR1        | IQSEC1   | PRKCB    | MYL2      | LEP      |
| SCARB2      | MVP      | SOCS3    | IL11      | PRKCCQ   |
| ITGB2       | MYL6     | CAPN2    | RIPK3     | F2R      |
| FCGR2A      | PDLIM7   | CTLA4    | AREG      | NRP1     |
| OGA         | RIOK1    | JAG1     | COL2A1    | SKP2     |
| MIR181A1    | RPS16    | CD69     | VTCN1     | PHLPP1   |
| MET         | SF1      | MLH1     | TNFRSF11A | SET      |
| MBL2        | SSBP1    | MAPK8IP1 | CALM3     | PIK3C2A  |
| MIR223      | SYNCRIP  | MIR34A   | ELN       | DAB2IP   |
| MMP8        | ADAMTSL4 | CASP8AP2 | FGFR4     | MIR199A1 |
| ALOX5       | BAG2     | KAT5     | CD22      | GADD45B  |
| PTH         | CEP170   | SOS1     | PLAT      | IGF2     |
| BPI         | CLINT1   | FGFR2    | C3        | APEX1    |
| RIGI        | COPS2    | MMP2     | TGM2      | MYH6     |
| SAMHD1      | CPSF3    | MT-RNR2  | ALPP      | IAPP     |
| MIR23A      | CPSF6    | GDAP1    | TLR7      | IL4R     |
| EXT1        | GOSR1    | PCSK9    | MYH9      | MIR19B1  |
| CDH23       | HNRNPF   | PRKD1    | EIF2AK3   | PRKAA1   |
| CYLD        | HNRNPH1  | CDK11B   | CD99      | PRNP     |
| RB1         | HNRNPH3  | FASN     | ANTXR2    | ITGB1    |
| ANGPT1      | HNRNPL   | DAPK2    | ANXA2     | PRKDC    |
| MECOM       | HNRNPM   | GORASP1  | VIP       | NOS1     |
| AFP         | HOOK1    | OPTN     | ANXA1     | RB1CC1   |
| DVL3        | KRT86    | IRS1     | POLE      | ROCK1    |
| CCL20       | LARP1    | ACVR1    | APOB      | GOS2     |
| SIL1        | LRRFIP2  | S100A9   | AGER      | HMGCR    |
| CDKN3       | MPP1     | ATRAID   | LTA       | PPARA    |
| PRL         | MRPS12   | VWF      | RHD       | CREBBP   |
| FABP1       |          | DES      |           | CAPN1    |
| MIR145      |          | NQO1     |           |          |
| IL33        |          | MYL3     |           |          |
| MMP14       |          |          |           |          |
| BAG4        |          |          |           |          |
| IL7         |          |          |           |          |

Table SII. Correlation between cell death gene signature genes and immune parameters in breast cancer.

| Gene   | CD8 <sup>+</sup> T-cell infiltration |                        | M1 macrophage abundance |                        | Immune score            |                        |
|--------|--------------------------------------|------------------------|-------------------------|------------------------|-------------------------|------------------------|
|        | Correlation coefficient              | P-value                | Correlation coefficient | P-value                | Correlation coefficient | P-value                |
| ANO6   | -0.228                               | 1.2 x 10 <sup>-5</sup> | -0.415                  | 1.6 x 10 <sup>-4</sup> | -0.365                  | 2.3 x 10 <sup>-6</sup> |
| PLK1   | -0.365                               | 4.5 x 10 <sup>-8</sup> | -0.215                  | 6.4 x 10 <sup>-3</sup> | -0.124                  | 0.012                  |
| SLC7A5 | -0.334                               | 3.9 x 10 <sup>-7</sup> | -0.103                  | 0.023                  | -0.401                  | 9.1 x 10 <sup>-7</sup> |
| TUB1C  | -0.369                               | 3.6 x 10 <sup>-7</sup> | -0.296                  | 4.6 x 10 <sup>-4</sup> | -0.327                  | 8.6 x 10 <sup>-6</sup> |
| TCN1   | 0.234                                | 2.9 x 10 <sup>-5</sup> | 0.265                   | 3.2 x 10 <sup>-5</sup> | 0.309                   | 7.4 x 10 <sup>-6</sup> |
